# Supplementary material for: The Wiggle Index: An Open Source Bioassay to Assess Sub-Lethal Insecticide Response in Drosophila melanogaster
Source: PLoS One. 2015 Dec 18;10(12):e0145051. doi: 10.1371/journal.pone.0145051 (PMC4684293; doi:10.1371/journal.pone.0145051)
Supplement: S1 Table — Recipes for both maize meal media (A) and grape juice plates (B) used in this study. (XLSX) [file pone.0145051.s003.xlsx]

## Sheet: Sheet1
	Hoff Food
Liters (Total)	1.22	2.44	3.05	3.66	4.88	6.1	7.32	8.54	9.76	10.98	12.2	13.42
H20 (Liters)	1	2	2.5	3	4	5	6	7	8	9	10	11
Soy Flour	20	40	50	60	80	100	120	140	160	180	200	220
Maize Meal	73	146	182.5	219	292	365	438	511	584	657	730	803
Yeast	35	70	87.5	105	140	175	210	245	280	315	350	385
Agar	6	12	15	18	24	30	36	42	48	54	60	66
Maltose	46	92	115	138	184	230	276	322	368	414	460	506
Dextrose	75	150	187.5	225	300	375	450	525	600	675	750	825
Acid Mix	14	28	35	42	56	70	84	98	112	126	140	154
Tegosept	16	32	40	48	64	80	96	112	128	144	160	176

## Sheet: Sheet2
Normal Food
Liters (Total)	1	2	3	4	5	6	7	8	9	10	11	12	13
Boil H20 (Liters)	786.66	1573.32	2359.98	3146.64	3933.3	4719.96	5506.62	6293.28	7079.94	7866.6	8653.26	9439.92	10226.6
Potassium Tartarate	8	16	24	32	40	48	56	64	72	80	88	96	104
Calcium Chloride	0.5	1	1.5	2	2.5	3	3.5	4	4.5	5	5.5	6	6.5
Agar	5.33333	10.6667	16	21.3333	26.6667	32	37.3333	42.6667	48	53.3333	58.6667	64	69.3333
yeast	12	24	36	48	60	72	84	96	108	120	132	144	156
Glucose	53.3333	106.667	160	213.333	266.667	320	373.333	426.667	480	533.333	586.667	640	693.333
Sucrose	26.6667	53.3333	80	106.667	133.333	160	186.667	213.333	240	266.667	293.333	320	346.667
Cold H20	200	400	600	800	1000	1200	1400	1600	1800	2000	2200	2400	2600
Semolina	66.6667	133.333	200	266.667	333.333	400	466.667	533.333	600	666.667	733.333	800	866.667
Acid Mix	11.6667	23.3333	35	46.6667	58.3333	70	81.6667	93.3333	105	116.667	128.333	140	151.667
Tegosept	15.3333	30.6667	46	61.3333	76.6667	92	107.333	122.667	138	153.333	168.667	184	199.333

## Sheet: Sheet3
S1 Table
Maize Meal Media Recipe			Grape Juice Plates
H20	1L		H20	720mL
Acid Mix	14mL		Agar	20g
Agar	6g		Apple Juice	200mL
Brewer's Yeast	35g		Brewer's Yeast	7g
Glucose	75g		Glucose	52g
Maize Meal	73g		Sucrose	26g
Maltose	46g		Tegosept	6mL
Soy Flour	20g
Tegosept	16mL
